# Supplementary material for: Outcomes and prognostic factors of alternative treatment regimens for angioimmunoblastic T-cell lymphoma: a retrospective analysis
Source: Front Oncol. 2025 Sep 10;15:1585013. doi: 10.3389/fonc.2025.1585013 (PMC12457117; doi:10.3389/fonc.2025.1585013)
Supplement: Supplementary file 6 [file Table1.xlsx]

## Sheet: Sheet1
Supplementary Table 1: Comprehensive follow-up data of the entire patient cohort (n=154)
ID	Treatment regimen	Response	OS(m)	OS(year)	Status	PFS(m)	PFS(year)	Status	Gender	Age	ECOG	PIT	B symptom	Ann Arbor	Hb	Anemia	RBC	WBC	PLT	Albumin	Globulin	LDH elevated	PCT elevated	CRP elevated	Bone marrow involvement	Involved extranodal areas≥2
PT1	CHOP	SD	72	6	1	72	6	1	1	66	0	2	0	2	148	0	4.93	8.9	257	44.2	26.4	0	1	1	1	0
PT2	CHOP	CR	103	8.58333	0	103	8.58333	0	0	49	1	1	0	2	131	0	4.26	5.01	131	43.3	29.8	1	0	0	0	0
PT3	CHOP	CR	0	0	0	0	0	0	1	51	2	2	0	2	153	0	5.2	8.5	241	39.5	24.1	1	0	1	0	0
PT4	CHOP	PD	41	3.41667	0	17	1.41667	0	1	50	1	1	0	2	123.6	0	4.12	6.55	319	42.6	27.8	0	0	0	0	0
PT5	CHOP	SD	48	4	0	48	4	0	0	50	1	1	0	2	129	0	4.26	3.3	135	44.3	24.6	1	0	0	0	0
PT6	CHOP	PD	26	2.16667	0	16.4	1.36667	0	1	57	1	1	0	2	135	0	4.59	3.3	192	37.7	37.2	1	0	0	0	0
PT7	CHOP	CR	22	1.83333	0	22	1.83333	0	0	49	0	2	0	2	136	0	4.41	6.7	277	41.1	20	0	0	0	1	0
PT8	CHOP	SD/PD	0	0	0	0	0	0	0	38	1	0	0	2	119	0	4.13	4.1	302	46.7	23.5	0	0	0	0	0
PT9	CHOP	PD	13	1.08333	1	2.3	0.191667	1	1	47	1	1	0	2	135	0	4.22	6.6	210	36.5	37.2	1	0	0	0	0
PT10	CHOP	CR	29	2.41667	0	7.1	0.591667	0	0	61	2	4	1	2	90.6	1	3.14	17.66	115	25.6	34.7	1	1	1	1	1
PT11	CHOP	SD	55.9	4.65833	0	55.9	4.65833	0	0	62	0	1	0	1	125	0	4.27	4.4	216	38.2	25.5	0	0	0	0	0
PT12	CHOP	SD	13.3	1.10833	1	13.3	1.10833	1	1	69	2	4	0	2	129	1	4.39	3.7	176	35.5	28.1	1	0	0	1	1
PT13	CHOP	CR	20	1.66667	0	20	1.66667	0	1	55	1	0	0	2	110	1	4	6.6	84	28.9	32.9	0	0	0	0	0
PT14	CHOP	SD	12	1	1	12	1	1	0	62	2	4	0	2	94.1	1	3.15	9.85	159	35.7	26.2	1	1	1	1	0
PT15	CHOP	SD	0	0	0	0	0	0	1	50	1	0	0	1	88	0	3.54	4.6	397	28.2	16.3	1	1	1	0	0
PT16	CHOP	PD	10	0.833333	1	10	0.833333	1	1	66	2	2	1	2	110	1	3.57	5	280	23.2	19.5	0	0	0	0	0
PT17	CHOP	PD	6	0.5	1	6	0.5	1	1	60	1	1	1	2	137	0	4.79	5.3	158	36.7	NA	1	1	1	0	0
PT18	CHOP	SD	20	1.66667	0	20	1.66667	0	0	53	3	2	1	2	101.2	1	3.55	18.06	140	24.2	34.4	1	1	1	0	0
PT19	CHOP	SD	32.3	2.69167	0	3.4	0.283333	0	1	51	3	3	1	2	95	1	3.47	6.5	192	36.6	21.3	1	1	1	1	0
PT20	CHOP	SD/PD	6	0.5	1	6	0.5	1	1	66	1	3	1	2	132	0	4.69	2.87	73	34.8	27.9	1	1	0	1	0
PT21	CHOP	PR	66.6	5.55	0	11	0.916667	0	1	68	2	2	0	1	123	0	4.34	5.8	302	38.5	26.4	0	1	1	0	0
PT22	CHOP	SD/PD	3.5	0.291667	1	3.5	0.291667	1	0	77	3	3	1	2	104	0	3.58	5	207	27.7	31.6	1	1	0	1	0
PT23	CHOP	PD	8	0.666667	1	8	0.666667	1	0	67	0	3	1	2	126	0	4.1	5.73	142	34.5	21.6	1	1	1	1	1
PT24	CHOP	PD	12	1	1	1	0.0833333	1	1	78	2	3	1	2	92	1	3.37	3.09	127	32.5	28.9	1	1	1	0	1
PT25	CHOP	PD	31	2.58333	0	2	0.166667	0	0	49	2	2	1	2	72	1	2.3	13.61	133	26.2	30.8	1	0	1	0	0
PT26	CHOP	SD/PD	11	0.916667	0	7	0.583333	0	0	69	1	1	0	1	139	0	4.64	5.69	353	38.5	31.3	0	0	0	0	0
PT27	CHOP	SD/PD	2	0.166667	1	2	0.166667	1	1	44	0	2	0	2	138	0	4.13	20.88	249	30.8	62.2	1	1	1	1	0
PT28	CHOP	PD	1	0.0833333	1	1	0.0833333	1	0	75	3	3	1	2	114	0	4.17	13.14	228	30.5	25.7	1	0	1	0	0
PT29	CHOP	PD	1	0.0833333	1	1	0.0833333	1	1	68	1	2	1	2	101	0	3.59	10.85	133	26.8	42	1	1	1	0	0
PT30	CHOP	PD	41	3.41667	0	14	1.16667	0	1	53	0	2	1	2	109	1	3.43	3.37	47	31.8	25.8	1	1	0	1	0
PT31	CHOP	PD	1	0.0833333	1	1	0.0833333	1	0	75	2	2	0	2	111	0	3.56	5.5	218	35.4	20.4	0	1	1	0	0
PT32	CHOP	SD	34	2.83333	0	24	2	0	0	65	0	2	1	2	110	0	3.71	7.22	154	41.1	19.8	1	1	0	0	0
PT33	CHOP	PR	27	2.25	1	27	2.25	1	1	75	3	3	1	2	58	1	1.67	16.54	365	31.1	28	0	1	1	1	0
PT34	CHOP	PD	9	0.75	1	6	0.5	1	1	74	2	3	1	2	71	1	2.43	7.62	96	28.9	43	1	1	1	0	0
PT35	CHOP	SD	30	2.5	1	27	2.25	1	1	67	2	2	1	2	117	0	4.4	10.04	195	34.5	27.1	0	0	1	0	0
PT36	CHOP	SD	49	4.08333	0	49	4.08333	0	0	67	2	3	1	2	111	0	4.45	6.7	91	34.1	29.6	1	1	1	0	0
PT37	CHOP	PD	14	1.16667	1	7	0.583333	1	1	44	2	2	1	2	42	0	1.4	1.3	115	28	25.1	1	1	1	0	0
PT38	CHOP	PD	3	0.25	1	3	0.25	1	0	74	3	4	0	2	145	1	5.39	19.15	178	27.8	24.9	1	1	1	1	0
PT39	CHOP	PD	5	0.416667	1	5	0.416667	1	1	83	3	3	1	2	91	0	2.98	9.61	218	35.8	19.5	1	0	1	0	1
PT40	CHOP	SD/PD	12	1	1	12	1	1	1	61	1	2	1	2	98	0	3.1	17.56	102	29.3	51.7	1	1	1	0	0
PT41	CHOP	SD/PD	10	0.833333	0	10	0.833333	0	1	44	0	0	0	1	128	0	4.68	7.04	323	38.3	29	0	0	0	0	0
PT42	CHOP	PD	2	0.166667	1	2	0.166667	1	1	70	3	4	1	2	74	1	2.44	9.6	254	27.9	54.7	1	1	1	1	0
PT43	CHOP	PR	20	1.66667	0	20	1.66667	0	0	69	2	4	1	2	77	1	2.76	4.25	152	33.4	26.9	1	1	1	1	1
PT44	CHOP	PR	45	3.75	0	45	3.75	0	0	70	3	3	1	2	130	0	4.35	10.4	294	35.9	28.4	1	1	1	0	0
PT45	CHOP	PD	4	0.333333	1	4	0.333333	1	1	67	3	3	1	2	126	1	3.9	13.64	189	32.5	25.7	1	0	0	0	0
PT46	CHOP	PD	1	0.0833333	1	1	0.0833333	1	1	62	3	3	1	2	50	1	1.42	6.3	92	21.9	35.2	0	0	1	1	1
PT47	CHOP	PD	1	0.0833333	1	1	0.0833333	1	1	50	4	3	1	2	30	1	0.87	2.46	119	35.1	24.3	1	1	1	1	1
PT48	CHOP	PR	16	1.33333	0	16	1.33333	0	0	63	1	1	0	2	122	0	4.37	10.46	260	35.8	26.7	0	0	0	0	0
PT49	CHOP	CR	23	1.91667	0	23	1.91667	0	1	75	2	2	0	1	131	0	4.27	7.05	280	37.1	29.4	0	0	0	0	0
PT50	CHOP	SD	4	0.333333	1	4	0.333333	1	1	69	1	2	1	2	94	0	3.19	5.42	103	27.5	35.5	1	1	1	0	0
PT51	CHOP	CR	19	1.58333	0	19	1.58333	0	1	62	0	1	0	1	160	0	5.56	6.24	214	41.7	26.2	0	0	0	0	0
PT52	CHOP	SD/PD	19	1.58333	1	19	1.58333	1	0	67	2	2	1	2	80	0	2.6	1.99	171	0	0	0	0	1	0	0
PT53	CHOP	CR	35	2.91667	1	35	2.91667	1	1	49	0	1	1	2	99	1	3.26	7.27	178	38.8	32.4	0	0	0	1	1
PT54	CHOP	PR	24	2	1	23	1.91667	1	0	83	1	1	1	2	105	0	3.5	10.36	182	33.2	41.4	0	0	1	0	0
PT55	CHOP	PD	2	0.166667	1	2	0.166667	1	0	48	3	3	1	2	98.1	0	4.5	7.8	193	28	46.9	1	0	1	1	0
PT56	CHOP	PR	43	3.58333	1	41	3.41667	1	0	73	2	3	1	2	74	0	2.51	3.78	243	34	38.3	1	0	0	0	0
PT57	CHOP	PR	94	7.83333	1	20	1.66667	1	0	49	1	1	1	2	73.5	1	2.5	12.5	152	29.5	23.8	1	0	1	0	0
PT58	CHOP	SD	17	1.41667	1	17	1.41667	1	1	51	1	1	1	2	77	1	0	3.75	233	31.2	22.2	1	0	1	0	0
PT59	CHOPE	SD	21	1.75	1	10.4	0.866667	1	1	67	1	2	0	2	109	0	3.63	7.3	283	38.9	35.9	1	1	1	0	0
PT60	CHOPE	PD	12	1	1	0.6	0.05	1	0	57	1	2	0	2	114.3	1	4.15	7.96	212	34.8	28.6	1	1	1	1	0
PT61	CHOPE	CR	29	2.41667	0	29	2.41667	0	0	56	0	1	0	2	127	0	3.96	4.06	229	44.4	28.2	0	0	0	1	0
PT62	CHOPE	PD	28	2.33333	0	28	2.33333	0	1	47	2	3	1	2	65	1	2.11	7.8	19	22.5	43.8	1	1	1	1	0
PT63	CHOPE	SD	22	1.83333	1	22	1.83333	1	0	71	3	3	1	2	86	0	2.8	4.9	146	36	22	1	1	1	0	0
PT64	CHOPE	PR	8	0.666667	0	8	0.666667	0	1	50	0	0	0	1	131	0	4.11	8.33	225	37.8	19.9	0	0	0	0	0
PT65	CHOPE	PD	0	0	0	0	0	0	1	58	1	2	0	2	86	1	3.27	9.04	283	27	38.5	1	1	1	1	0
PT66	CHOPE	CR	13	1.08333	0	13	1.08333	0	0	51	1	1	0	2	131	0	4.48	5.11	327	43.7	28.7	0	0	0	0	0
PT67	CHOPE	CR	11	0.916667	1	11	0.916667	1	1	56	1	1	1	2	78	1	2.59	9.14	59	40.6	16.3	0	1	0	0	0
PT68	CHOPE	PR	29	2.41667	0	29	2.41667	0	0	55	2	3	0	2	40	1	1.07	2.81	167	35.4	26	1	0	0	1	0
PT69	CHOPE	PD	18	1.5	0	3	0.25	0	1	57	0	1	0	2	118	1	3.99	12.84	231	29.1	37.9	1	0	1	0	1
PT70	CHOPE	PR	11	0.916667	1	5	0.416667	1	1	65	3	3	1	2	61	0	1.9	2.97	188	28.9	24.5	1	1	1	0	0
PT71	CHOPE	PD	6	0.5	1	6	0.5	1	0	77	2	2	1	2	79	0	2.63	3.55	95	22.9	35.5	0	1	1	0	1
PT72	CHOPE	PD	37	3.08333	0	11	0.916667	0	0	55	0	2	0	2	108	1	3.72	33.2	207	28.7	69.4	1	1	1	1	0
PT73	CHOPE	SD/PD	70	5.83333	0	70	5.83333	0	0	64	3	4	1	2	62	1	0.9	3.3	87	24	56.6	1	0	0	1	0
PT74	CHOPE	SD/PD	16	1.33333	1	16	1.33333	1	0	65	1	2	1	2	99	1	3.69	29.58	27	25.3	39	1	1	1	0	0
PT75	CHOPE	PD	32	2.66667	0	32	2.66667	0	1	46	0	1	0	2	83	1	2.92	1.17	196	28.9	55.8	1	1	1	0	0
PT76	CHOPE	CR	42	3.5	0	42	3.5	0	1	72	1	1	0	2	138	0	4.98	5.41	172	26.6	25.3	0	1	1	0	0
PT77	CHOPE	PD	19	1.58333	1	9	0.75	1	1	54	1	2	0	2	128	1	4.6	9.53	224	31.7	28.8	1	0	0	1	1
PT78	CHOPE	PD	1	0.0833333	1	1	0.0833333	1	1	75	1	2	0	2	32	0	0.7	9.56	267	33.6	16.6	1	1	1	0	0
PT79	CHOPE	PR	43	3.58333	0	43	3.58333	0	0	43	1	0	0	1	105	0	4.51	2.04	282	38.1	25.3	0	0	0	0	0
PT80	CHOPE	CR	13	1.08333	0	13	1.08333	0	0	50	1	1	0	2	108	0	1.53	6.08	343	39.5	28.5	1	1	1	0	0
PT81	CHOPE	PD	28	2.33333	0	28	2.33333	0	1	66	1	3	1	2	92	1	3.29	28.35	52	24.8	23.9	1	1	1	1	1
PT82	CHOPE	PD	1	0.0833333	1	1	0.0833333	1	1	66	3	3	0	2	44	0	1.24	2.47	116	30.1	27.9	1	0	1	0	0
PT83	CHOPE	PD	27	2.25	0	25	2.08333	0	0	50	1	2	0	2	42	1	1.5	1.2	34	30.5	20.6	1	1	1	1	1
PT84	CHOPE	PD	20	1.66667	1	16	1.33333	1	1	55	2	1	1	2	109	1	3.88	9.24	224	27.3	18.7	0	1	1	0	0
PT85	CHOPE	PD	0	0	0	0	0	0	1	50	1	0	1	2	95	0	3.29	2.52	122	27.5	21.4	0	1	1	0	0
PT86	CHOPE	PR	46	3.83333	0	46	3.83333	0	1	56	1	2	1	2	105	1	3.5	15.59	136	29.4	37.8	1	1	0	1	0
PT87	CHOPE	PR	9	0.75	1	9	0.75	1	1	51	0	1	0	2	145	0	4.87	6.6	274	42	27.8	1	0	0	0	0
PT88	CHOPE	CR	15	1.25	0	13	1.08333	0	1	62	0	2	1	2	120	0	3.69	7.64	218	36.6	62.8	1	0	1	0	0
PT89	CHOPE	SD/PD	40	3.33333	1	40	3.33333	1	1	52	1	0	0	2	117	1	3.8	8.22	197	35.8	25.2	0	0	1	0	0
PT90	CHOPE	SD/PD	48	4	1	32	2.66667	1	0	66	1	2	1	2	104	0	3.83	11.32	308	33.4	49.1	0	0	0	0	0
PT91	CHOPE	PD	16	1.33333	1	13	1.08333	1	1	76	1	2	0	2	125	0	4.03	4.74	115	36.2	36.3	1	0	0	0	0
PT92	CPET	PD	33.4	2.78333	0	5.4	0.45	0	1	65	1	2	0	2	89	0	2.34	5.8	232	33.3	42.8	1	0	0	0	0
PT93	CPET	PR	10	0.833333	1	10	0.833333	1	1	65	2	2	1	2	90	1	3.1	5.4	220	37.9	22.1	0	0	0	1	1
PT94	CPET	PR	56	4.66667	0	7	0.583333	0	1	49	1	0	0	2	117	0	3.95	3.1	185	44.2	32.6	0	0	0	0	0
PT95	CPET	PD	20	1.66667	0	2.2	0.183333	0	0	61	3	4	1	2	98	1	3.74	8.32	188	30.8	33.2	1	1	1	1	0
PT96	CPET	SD/PD	4.3	0.358333	1	4.3	0.358333	1	1	66	4	3	1	2	35	0	1.18	1.8	25	19.9	23.4	1	1	1	0	0
PT97	CPET	SD	4	0.333333	0	4	0.333333	0	1	62	0	1	0	1	135	0	4.27	4.51	270	40.1	37.2	0	0	0	0	0
PT98	CPET	PD	0	0	0	0	0	0	1	54	2	2	1	2	96	1	3.61	1.97	186	31.9	28.4	1	1	1	0	1
PT99	CPET	PD	22	1.83333	1	2.1	0.175	1	1	40	2	2	0	2	93	1	3.1	6.2	60	32.1	21.8	1	1	1	1	1
PT100	CPET	CR	19	1.58333	1	5.8	0.483333	1	1	47	2	3	0	2	131	0	4.34	6.7	282	38	23.2	1	0	1	1	0
PT101	CPET	SD/PD	3	0.25	1	3	0.13	0	1	78	2	3	1	2	102.8	0	3.01	19.23	63	30.8	40.6	1	0	1	0	0
PT102	CPET	PD	6	0.5	1	3.4	0.283333	1	1	62	2	2	1	2	128	0	4.39	4.7	162	37.6	25.7	0	0	1	0	0
PT103	CPET	PR	31	2.58333	0	31	2.58333	0	1	56	1	2	0	2	101	1	3.19	7.8	116	38.6	20.4	1	1	1	1	1
PT104	CPET	CR	47	3.91667	0	47	3.91667	0	1	65	1	2	1	2	126	0	4.41	7.7	179	34.8	26.2	1	0	1	0	0
PT105	CPET	PD	5	0.416667	1	2.9	0.241667	1	0	72	2	3	0	2	86	1	2.81	7.3	516	24.3	21.2	1	1	1	0	0
PT106	CPET	PD	11	0.916667	1	11	0.916667	1	1	89	3	3	1	2	118	0	3.6	2.57	93	29.3	41	1	1	1	0	0
PT107	CPET	PD	12	1	1	12	1	1	1	72	2	4	1	2	72	0	11.11	2.97	68	32.2	23.1	0	1	1	1	0
PT108	CPET	PD	0	0	0	0	0	0	0	51	1	1	1	2	76	0	3.37	7.8	258	32.8	29.1	1	1	1	0	0
PT109	CPET	PR	17	1.41667	1	12.4	1.03333	1	0	65	4	4	0	2	123	0	4.39	3.7	190	35.8	26.9	1	0	1	1	0
PT110	CPET	CR	35	2.91667	0	33.2	2.76667	0	1	56	1	2	1	2	111	0	3.91	10.6	227	27.2	27.2	1	0	0	0	0
PT111	CPET	PR	25	2.08333	0	25	2.08333	0	1	51	3	3	1	2	126	1	4.07	2.4	106	38.2	26.5	0	0	0	1	0
PT112	CPET	PR	23	1.91667	0	23	1.91667	0	0	45	1	0	1	2	105	1	4.17	3.04	70	37.2	24.4	0	0	0	0	1
PT113	CPET	PR	19.5	1.625	0	16.4	1.36667	0	1	45	1	0	0	2	148.1	0	4.82	3.35	142	48.7	19.8	0	0	0	0	0
PT114	CPET	PR	41	3.41667	0	41	3.41667	0	0	48	0	0	0	1	125	0	3.98	4.8	174	43.7	19.9	0	1	0	0	0
PT115	CPET	SD	4	0.333333	1	4	0.333333	1	1	74	3	3	1	2	126.6	0	4.36	5.47	251	37.5	40.5	1	1	1	0	0
PT116	CPET	PR	24.4	2.03333	0	8.1	0.675	0	1	68	2	4	1	2	115.4	1	4.44	4.06	94	33.6	20.1	1	1	1	1	1
PT117	CPET	PR	24.4	2.03333	0	24.4	2.03333	0	1	66	1	1	0	1	133	0	4.13	5.32	208	38.2	27.3	0	0	0	0	0
PT118	CPET	PR	25.5	2.125	1	25.6	2.13333	1	1	52	1	0	0	2	109.5	0	3.74	3.94	293	37.2	31	0	0	0	0	0
PT119	CPET	PR	37.6	3.13333	0	37.6	3.13333	0	1	47	1	0	0	2	114	1	3.75	7.7	290	33.1	34.8	0	0	1	0	0
PT120	CPET	PD	37	3.08333	0	7.2	0.6	0	1	38	1	0	0	2	129	0	4.09	6.7	239	37.5	33.3	0	1	1	0	0
PT121	CPET	PR	15.5	1.29167	1	14.1	1.175	1	1	73	2	2	0	1	141	0	4.45	6.04	201	45.9	31.1	0	0	0	0	0
PT122	CPET	SD	5.3	0.441667	1	5.3	0.441667	1	1	45	2	1	1	2	77	1	2.66	3.18	143	29.6	35.1	0	1	1	0	0
PT123	CPET	SD	20	1.66667	1	6.7	0.558333	1	0	66	2	3	0	2	110	1	3.57	11.29	143	41.9	28.7	1	0	0	0	0
PT124	CPET	SD	16.5	1.375	0	16.5	1.375	0	0	72	3	1	0	1	129	0	4.32	7.78	203	38.6	23.3	0	1	1	0	0
PT125	CPET	PD	36.2	3.01667	0	19.6	1.63333	0	1	66	1	4	1	2	109	1	3.7	3.84	181	36.4	30.9	1	0	0	1	1
PT126	CPET	SD	2	0.166667	1	2	0.166667	1	1	77	2	4	1	2	146	0	4.84	15.26	221	30.4	43.8	1	1	1	1	1
PT127	GDPT	PD	54	4.5	0	1.7	0.141667	0	1	65	1	2	1	2	104	0	3.46	3.4	93	35	29.9	1	0	0	0	0
PT128	GDPT	SD/PD	45.7	3.80833	0	45.7	3.80833	0	1	71	2	3	1	2	91	0	1.28	0	0	0	36.7	1	0	0	0	0
PT129	GDPT	SD/PD	0	0	0	0	0	0	1	39	0	1	0	2	124	0	4.25	2.9	371	38.8	24.8	1	0	1	0	0
PT130	GDPT	PD	19	1.58333	1	15.8	1.31667	1	1	72	3	4	0	2	85	0	2.98	3.49	134	34.6	45.9	1	1	1	1	0
PT131	GDPT	PR	20	1.66667	1	17.4	1.45	1	1	66	1	3	0	2	130	0	4.36	6.8	206	46.4	30.3	1	1	1	0	0
PT132	GDPT	SD	0	0	0	0	0	0	1	56	2	2	1	2	100	0	3.22	4.28	226	32.5	65.5	1	0	1	0	0
PT133	GDPT	SD	48	4	1	1.4	0.116667	1	1	55	0	2	0	2	122	0	4.16	4.3	223	27.2	34.7	1	0	1	0	0
PT134	GDPT	CR	83.7	6.975	0	38.8	3.23333	0	1	70	2	3	1	2	113	1	3.88	5.7	78	30.6	18.8	0	1	1	0	0
PT135	GDPT	PD	75	6.25	0	5.1	0.425	0	1	53	1	1	0	2	132	0	4.74	7.2	271	44.3	28.3	1	0	0	0	0
PT136	GDPT	SD	20	1.66667	0	20	1.66667	0	1	69	2	0	0	1	123.9	0	4.08	7.35	251	38.5	28.1	0	0	1	0	0
PT137	GDPT	SD/PD	0	0	0	0	0	0	0	56	2	3	0	2	85	1	2.56	3.77	218	40.2	35.9	1	0	0	1	0
PT138	GDPT	SD/PD	46	3.83333	1	46	3.83333	1	0	69	1	1	0	2	117	0	3.95	6.7	319	79.2	35.4	0	1	0	0	0
PT139	GDPT	PD	41.6	3.46667	0	2.1	0.175	0	1	26	1	3	0	2	101	1	3.35	4.28	158	32.2	40	1	1	0	1	0
PT140	GDPT	CR	84.5	7.04167	0	84.5	7.04167	0	1	46	1	1	1	2	138	0	4.7	7.2	125	41.2	31.9	1	0	0	0	0
PT141	GDPT	SD	4.5	0.375	1	4.5	0.375	1	0	55	2	2	0	2	133	0	3.91	7	205	31.8	29.8	1	1	0	0	0
PT142	GDPT	SD/PD	2	0.166667	1	2	0.166667	1	0	68	2	4	1	2	99	0	2.88	6.88	16	30.2	36.7	1	1	1	0	0
PT143	GDPT	PR	64.5	5.375	0	55.9	4.65833	0	1	52	1	2	1	2	118	1	3.98	5.6	200	32.7	46.8	1	0	1	1	0
PT144	GDPT	SD/PD	5	0.416667	1	5	0.416667	1	1	60	2	3	1	2	146	0	5.08	12.9	147	38	24.8	1	1	1	1	1
PT145	GDPT	SD	10	0.833333	1	10	0.833333	1	1	62	1	3	0	2	127	1	4.37	11.7	196	30.2	35.6	1	1	1	1	0
PT146	GDPT	PR	24	2	0	14.5	1.20833	0	1	64	1	0	0	2	164	0	5.33	12.39	258	35.7	17.5	0	0	0	0	0
PT147	GDPT	PD	26	2.16667	1	2.2	0.183333	1	0	53	2	0	1	2	100	1	2.6	1.4	122	45	15.6	0	0	0	1	0
PT148	GDPT	PR	51	4.25	0	51	4.25	0	1	50	3	2	1	2	91	1	3.61	15.85	292	31.8	44.2	0	1	1	1	1
PT149	GDPT	SD/PD	2	0.166667	1	2	0.166667	1	0	71	2	3	0	1	95	0	3.28	27.18	86	30.2	32.1	1	1	1	0	0
PT150	GDPT	PD	8	0.666667	1	8	0.666667	1	0	68	2	2	1	2	94	0	3.65	23.5	258	31.5	22.8	0	1	1	0	0
PT151	GDPT	SD/PD	2	0.166667	0	2	0.166667	0	1	72	2	3	0	2	132	0	4.27	5.11	248	39	21.2	1	0	0	0	0
PT152	GDPT	PR	23	1.91667	1	23	1.91667	1	1	70	2	4	0	2	89	1	3.2	4.22（2017/01/12）	178	29.2	22	0	0	0	1	1
PT153	GDPT	CR	82	6.83333	0	64	5.33333	0	0	55	1	1	1	1	118	0	3.98	9.9	290	37.3	37.2	1	0	0	0	0
PT154	GDPT	SD/PD	3	0.25	1	3	0.25	1	0	73	3	3	1	2	109	1	3.9	9.46	269	36.9	36.5	0	0	1	1	0
Status:1, dead;0,survival. Gender:1,male;0,female. Ann Arbor:1,I-II;2,III-IV. LDH elevated,PCT elevated,CRP elevated:1,elevated;0,normal. Bone marrow involvement:1, involvement;0,non-involvement. Involved extranodal areas≥2:1,involved extranodal areas≥2;0,involved extranodal areas<2
